# Supplementary material for: Whole-genome CRISPR screen identifies RAVER1 as a key regulator of RIPK1-mediated inflammatory cell death, PANoptosis
Source: PubMed Central journal article supplement — iScience. 2023 May 22;26(6):106938. doi: 10.1016/j.isci.2023.106938 (PMC10265528; doi:10.1016/j.isci.2023.106938), 2023-05-22
Supplement: mmc1.pdf [file mmc1.pdf]

iScience, Volume 26

## **Supplemental information**

**Whole-genome CRISPR screen identifies**

**RAVER1 as a key regulator of RIPK1-mediated**

**inflammatory cell death, PANoptosis**

**R.K. Subbarao Malireddi, Ratnakar R. Bynigeri, Raghvendra Mall, Eswar Kumar Nadendla, Jon P. Connelly, Shondra M. Pruett-Miller, and Thirumala-Devi Kanneganti**

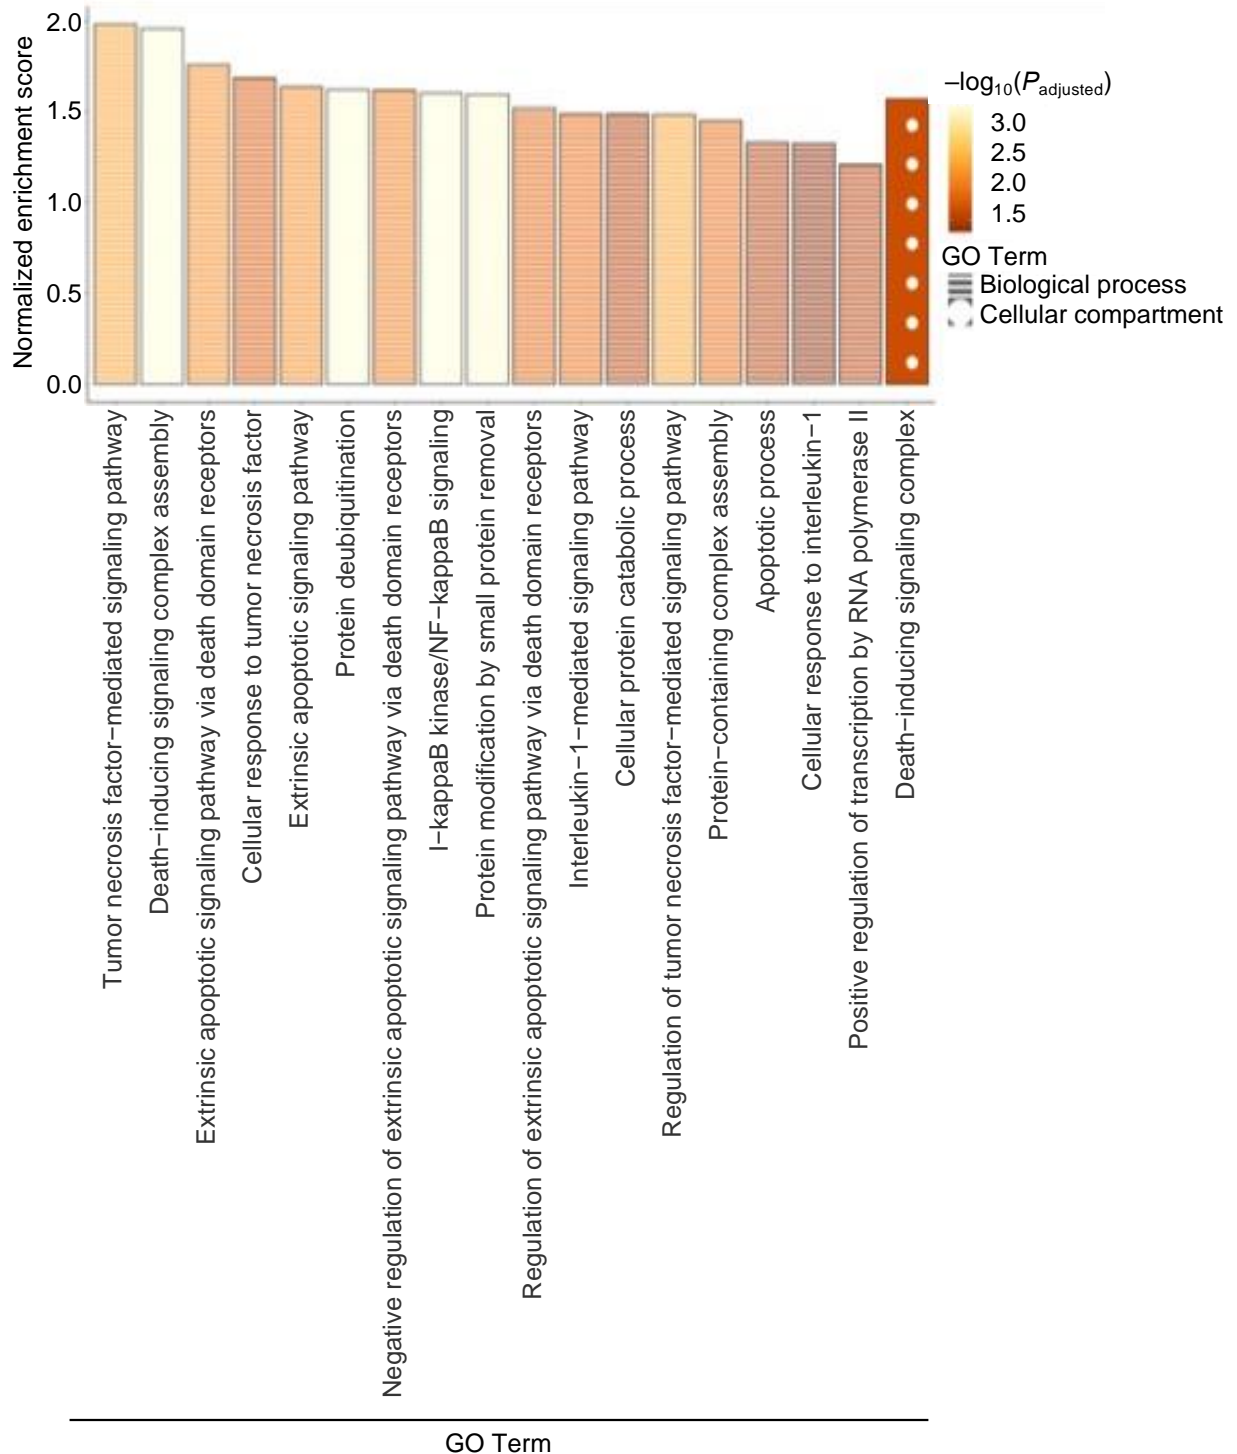

**Figure S1. Cell signaling processes and complexes are enriched in the TAK1 inhibitor CRISPR screen. See also Figure 1**

Top enriched Gene Ontology (GO) terms among all positively enriched gRNA-targeted genes, including significantly enriched biological processes and cellular components, using the 'fgsea' package in R are shown.

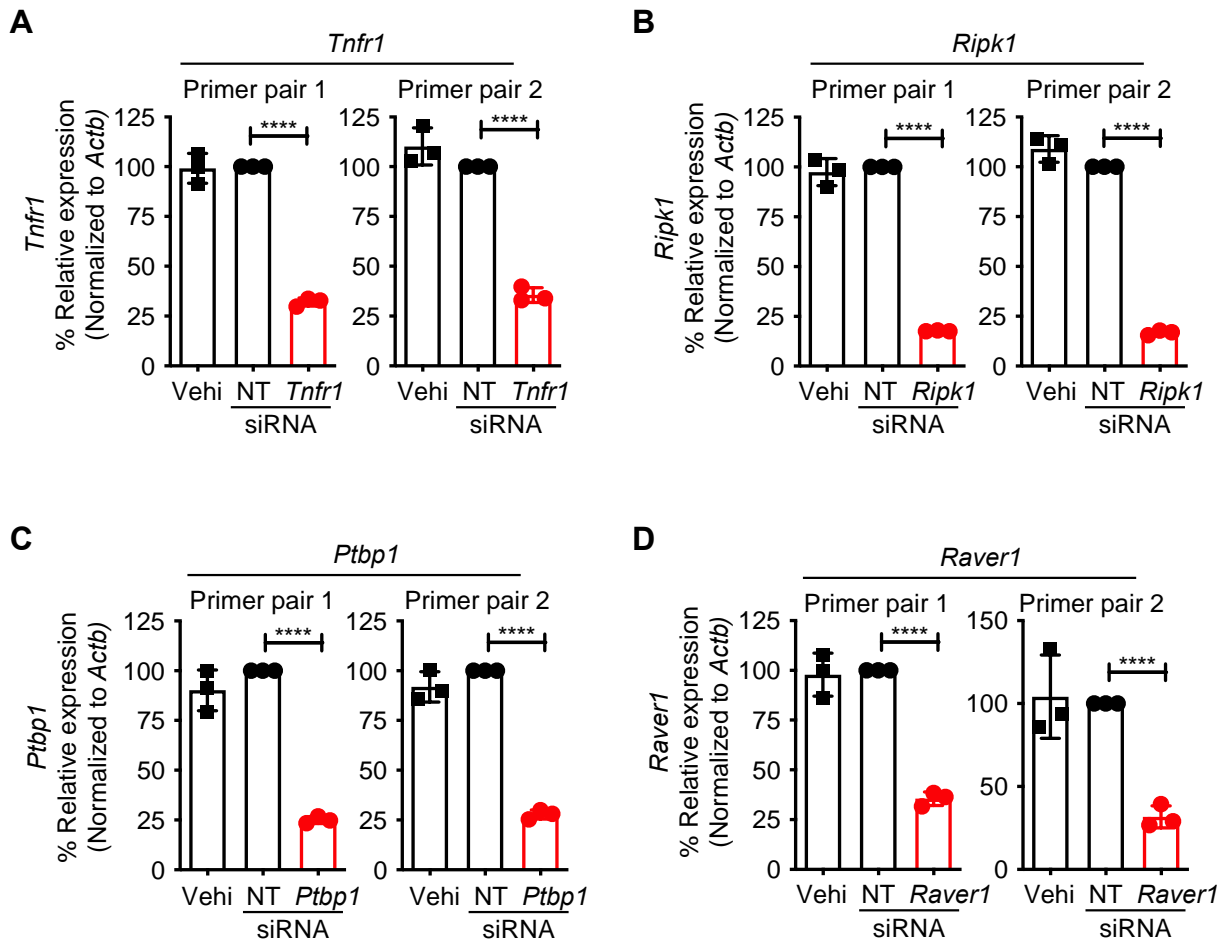

**Figure S2. siRNA successfully knocked down the gene expression of *Tnfr1*, *Ripk1*, *Ptbp1* and *Raver1*. See also Figure 2**

(A–D) The indicated qPCR analyses were performed from the cDNA prepared from the total RNA isolated from bone marrow-derived macrophages (BMDMs) treated with vehicle control (Vehi) or transfected with NT (non-targeting) siRNA or gene-specific siRNAs for 48 h. The data were normalized to the internal control of *Actb* mRNA expression and presented as percent knockdown with respect to the NT siRNA transfected BMDMs. All data are presented as mean  $\pm$  SEM, from three replicate samples ( $n = 3$ ) (A–D).  $P < 0.05$  is considered statistically significant. \*\*\*\*  $P < 0.001$  (two-tailed  $t$  test [B]). Data are representative of three independent experiments (A–D).

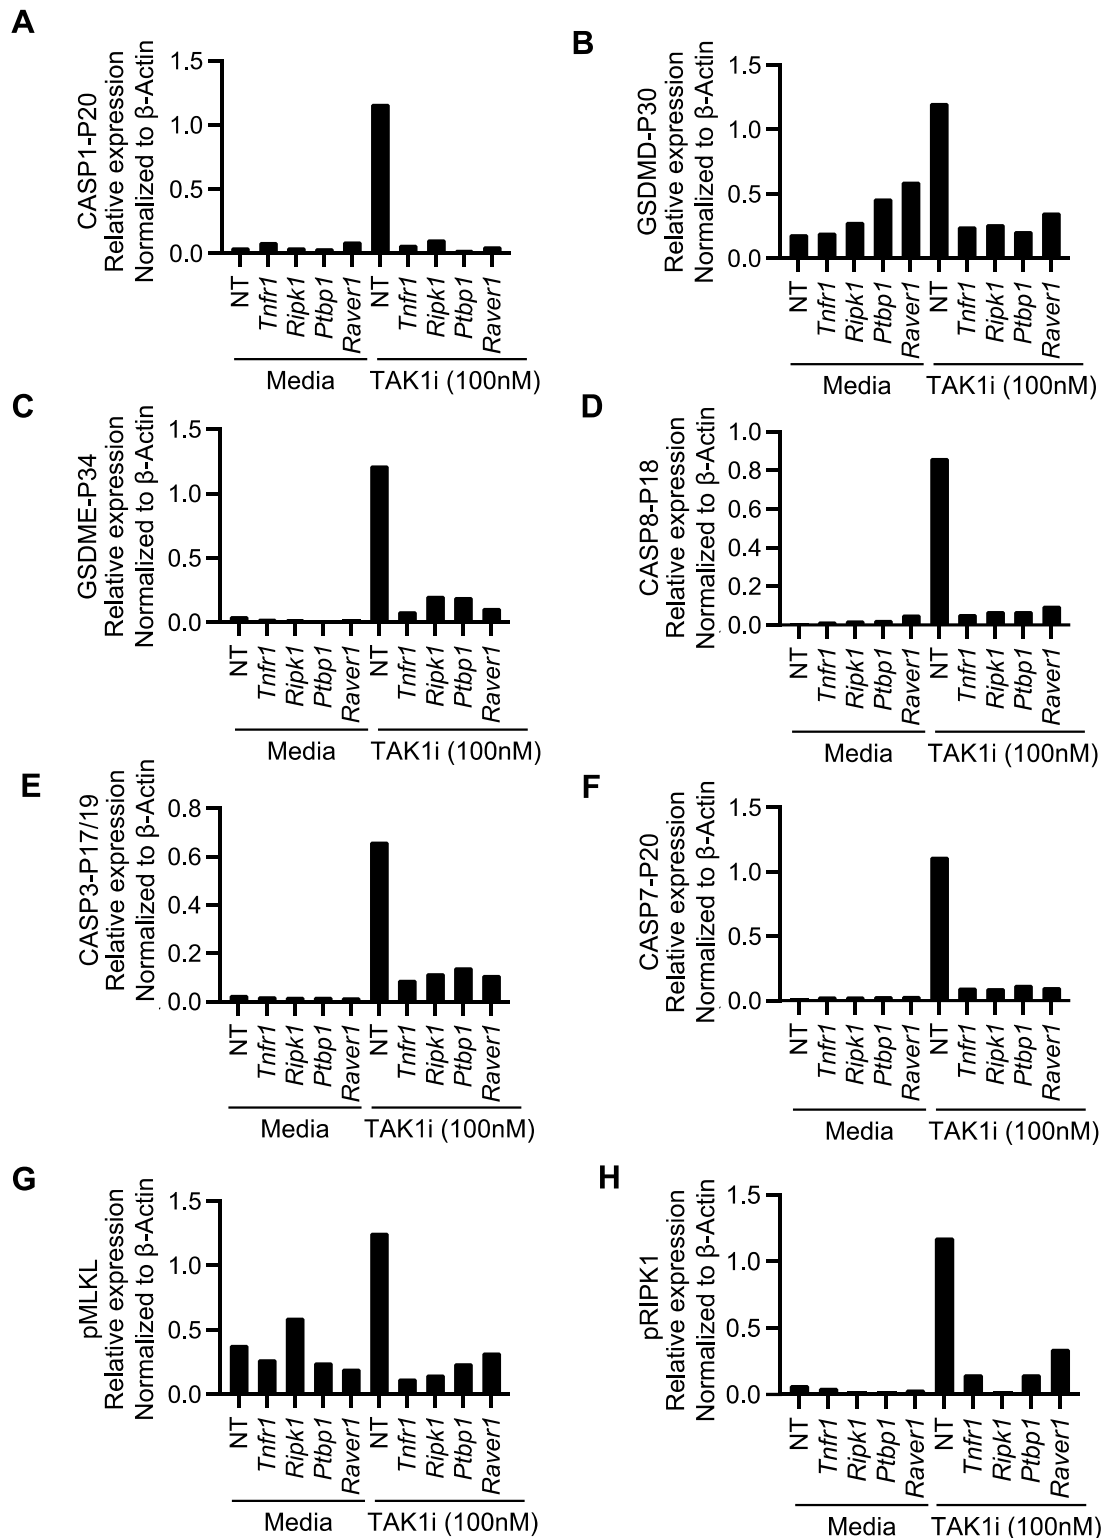

**Figure S3. TAK1 inhibition-mediated PANoptosis is blocked by loss of PTB splicing factors. See also Figure 3**

(A–H) Densitometry quantification of Western blot data reported in Figure 3. Densitometry expressed as relative values normalized to  $\beta$ -Actin expression. Data are representative of three independent experiments with  $n = 2-3$  in each repeat (A–H).

**A**

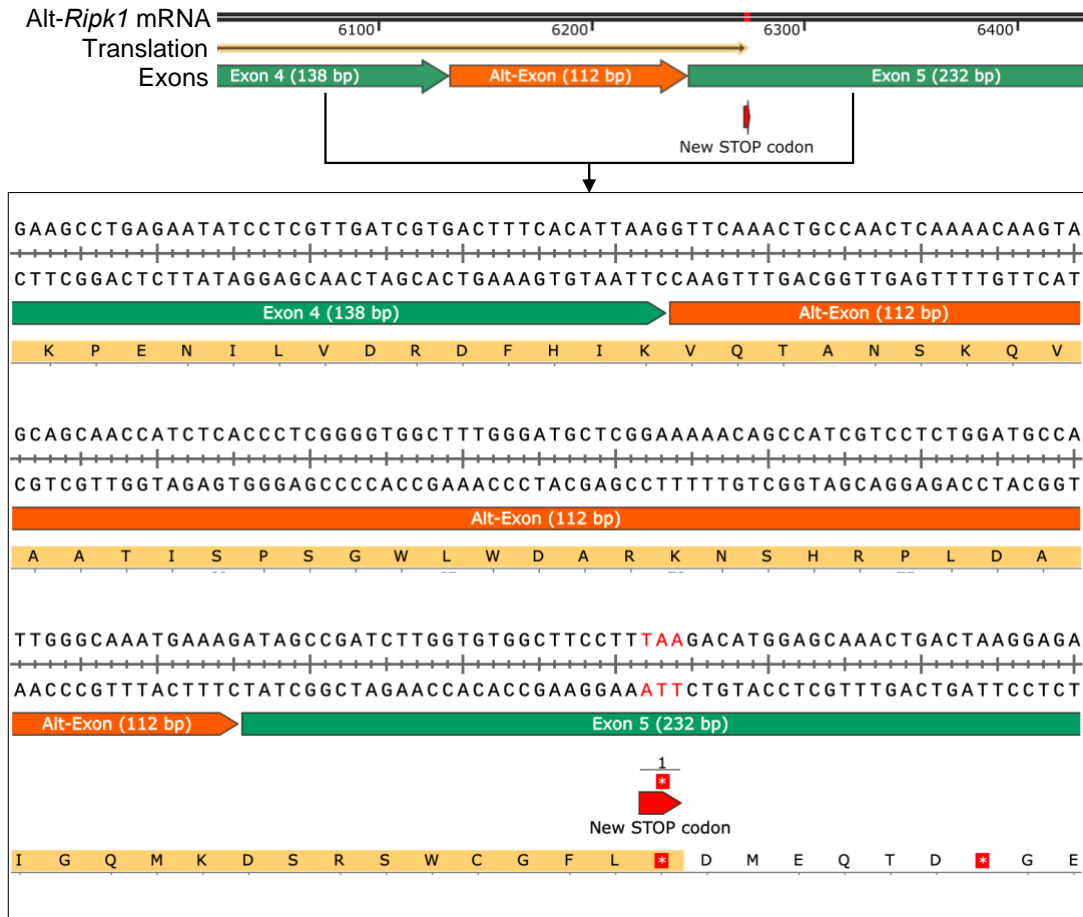

**Figure S4. The alternative *Ripk1* transcript contains a stop codon that results in a non-functional RIPK1. See also Figure 4**

(A) Depiction of the alternative (Alt) *Ripk1* mRNA that results from alternative splicing to bring together Exon 4, Alt Exon and Exon 5. Nucleic acid base and translation details are provided, along with the Alt-exon-produced frameshift and the resulting stop codon in the *Ripk1* mRNA transcript.

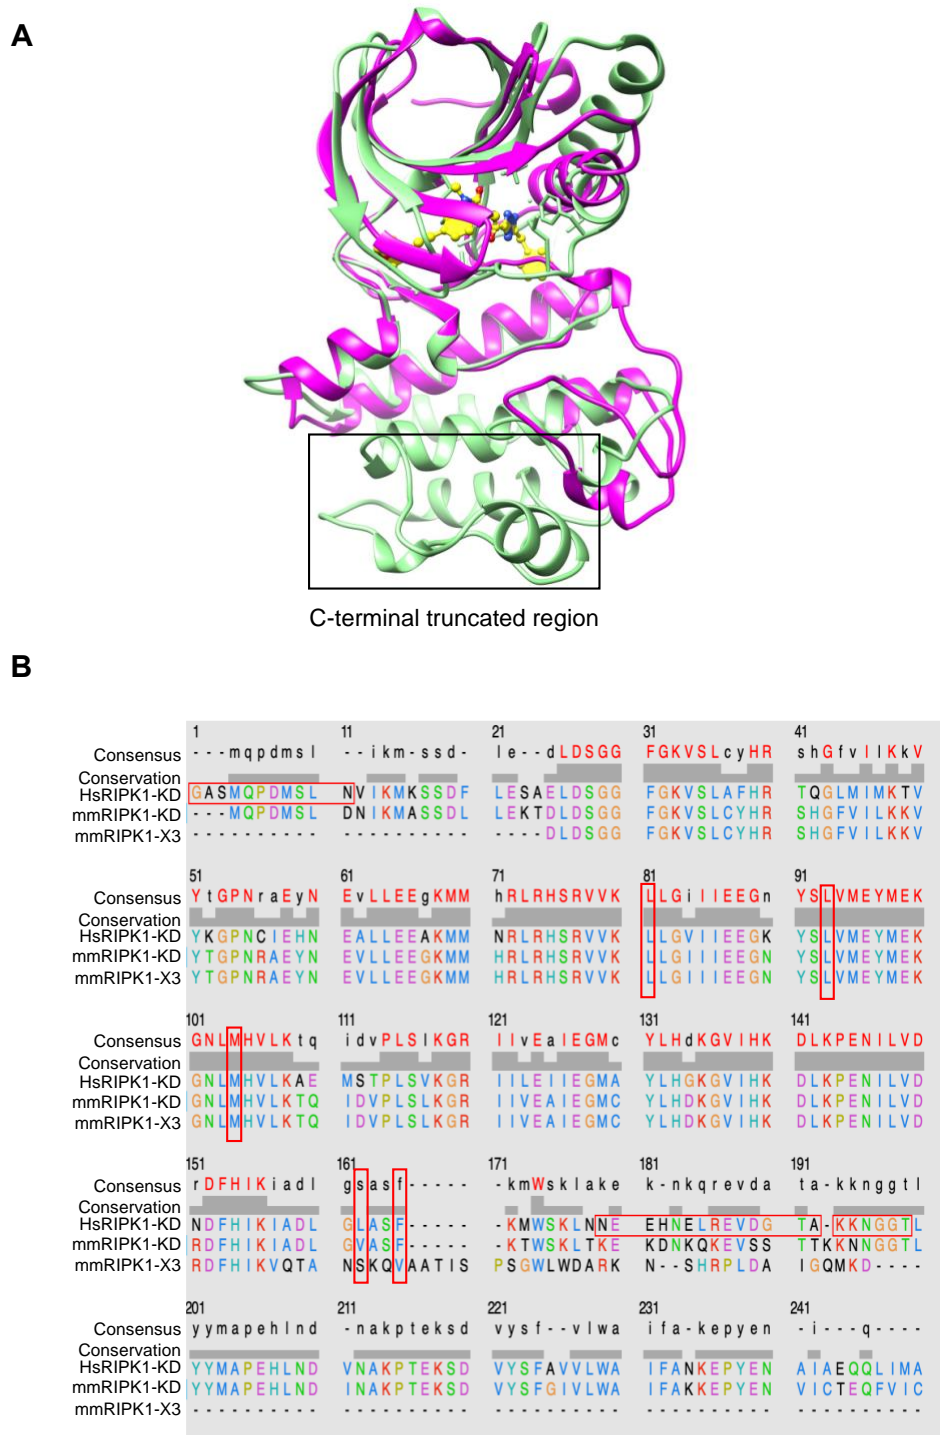

**Figure S5. Alternative splicing of RIPK1 results in a C-terminal truncation and structural changes. See also Figure 4**

(A) The human RIPK1-KD structure (PDB ID-7FD0; green) and the alternatively spliced mouse mRIPK1-X3 variant model generated by Robetta (magenta). The C-terminal truncated region found in human RIPK1-KD that is absent in mmRIPK1-X3 is denoted by the black box. (B) Sequence alignment of human RIPK1-KD (HsRIPK1-KD), mouse RIPK1-KD (mmRIPK1-KD) and mouse alternatively spliced variant mmRIPK1-X3. The allosteric and ATP binding site residues are denoted in red vertical boxes.

**Table S1. Primer sequences for qPCR analyses. See also STAR Methods**

| <b>Gene</b>           | <b>Froward primer</b>                         | <b>Seq (5' to 3')</b>  | <b>Reverse primer</b>                                | <b>Seq (5' to 3')</b>   |
|-----------------------|-----------------------------------------------|------------------------|------------------------------------------------------|-------------------------|
| <i>Tnfrsf1a</i>       | Tnfrsf1a-RT-F1                                | CCGGGAGAAGAGGGATAGCTT  | Tnfrsf1a-RT-R1                                       | TCGGACAGTCACTCACCAAGT   |
| <i>Tnfrsf1a</i>       | Tnfrsf1a-RT-F2                                | GGGGATACATCCATCAGGGGT  | Tnfrsf1a-RT-R2                                       | GCTCGGACAGTCACTCACC     |
| <i>Ripk1</i>          | Ripk1-RT-F1                                   | GAAGACAGACCTAGACAGCGG  | Ripk1-RT-R1                                          | CCAGTAGCTTCACCACTCGAC   |
| <i>Ripk1</i>          | Ripk1-RT-F2                                   | GCACCCGAACACCTGAATGA   | Ripk1-RT-R2                                          | CGAACTGCTCAGTACAGATGACA |
| <i>Ptbp1</i>          | Ptbp1-RT-F1                                   | CACACCCCAAAGCCTCTTTAT  | Ptbp1-RT-R1                                          | ATCTGCACAAGTGCGTTCTCC   |
| <i>Ptbp1</i>          | Ptbp1-RT-F2                                   | CAGCAGCCAATGGAAACGATA  | Ptbp1-RT-R2                                          | GCAGCTTTCTGACATGGATGAC  |
| <i>Raver1</i>         | Raver1-RT-F1                                  | ATGGGCAGCTAAAGGGCTTC   | Raver1-RT-R1                                         | GCCTCGATTAAGAGCCGTGG    |
| <i>Raver1</i>         | Raver1-RT-F2                                  | GACAGCTTTTGTGACTCTGCT  | Raver1-RT-R2                                         | TCAGACTAGGTGGTAGGTTGG   |
| <i>Ripk1-Alt-Exon</i> | Ripk1-RT-New-F1<br>(Forward primer in Fig. 4) | GATAATCGTGGAGGCCATAGAA | Ripk1-RT-AltExon4-R1<br>(Reverse primer 1 in Fig. 4) | GTGAGATGGTTGCTGCTACTTG  |
| <i>Ripk1-Alt-Exon</i> | Ripk1-RT-New-F1<br>(Forward primer in Fig. 4) | GATAATCGTGGAGGCCATAGAA | Ripk1-RT-AltExon4-R2<br>(Reverse primer 2 in Fig. 4) | CTTTCATTTGCCCAATGGCATCC |
